# Supplementary material
Source: PubMed Central journal article supplement (PMC3286536)

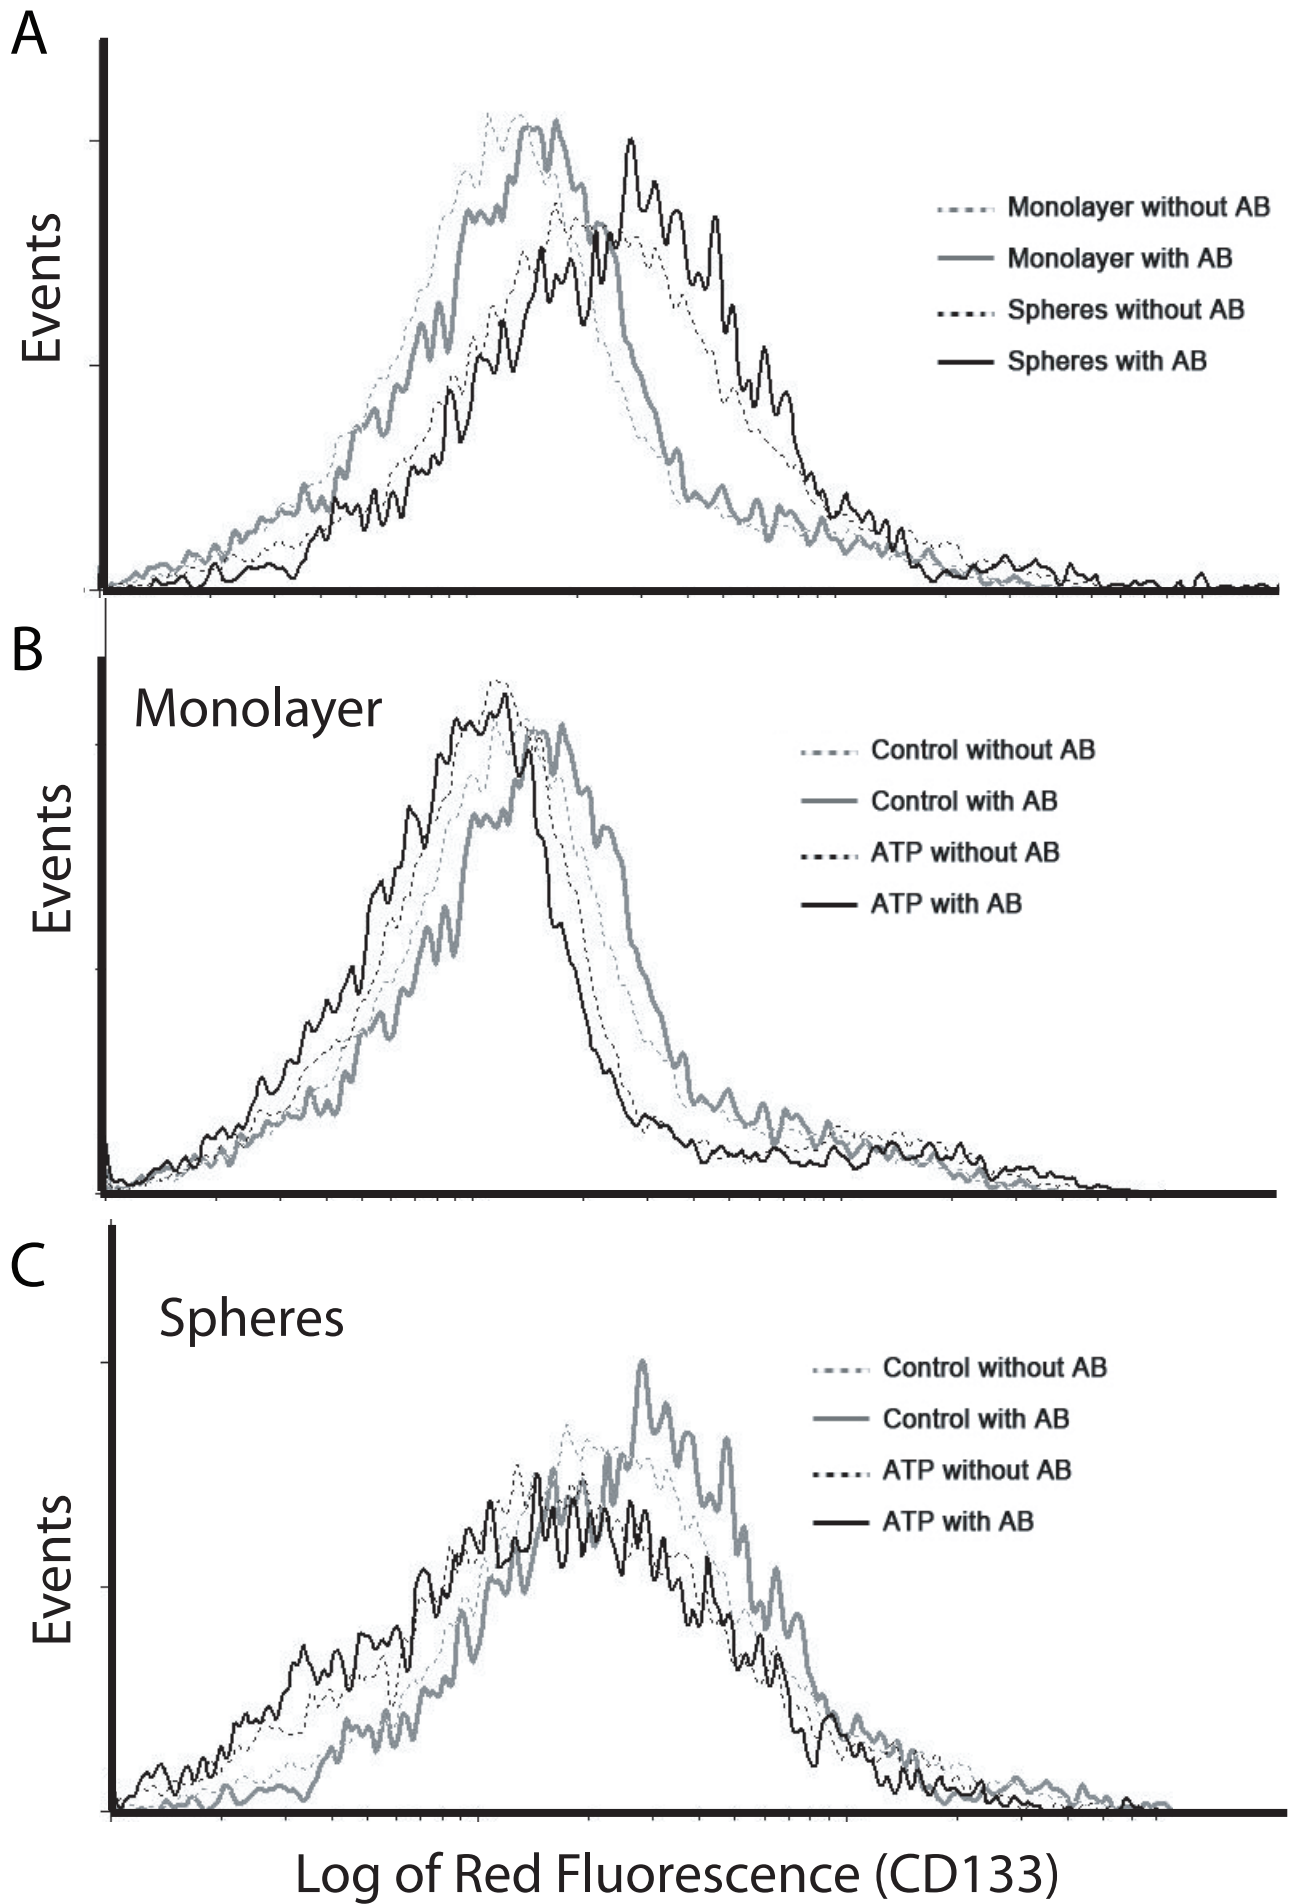

Supplement: 11302_2011_9252_MOESM1_ESM.pdf [file 11302_2011_9252_MOESM1_ESM.pdf]

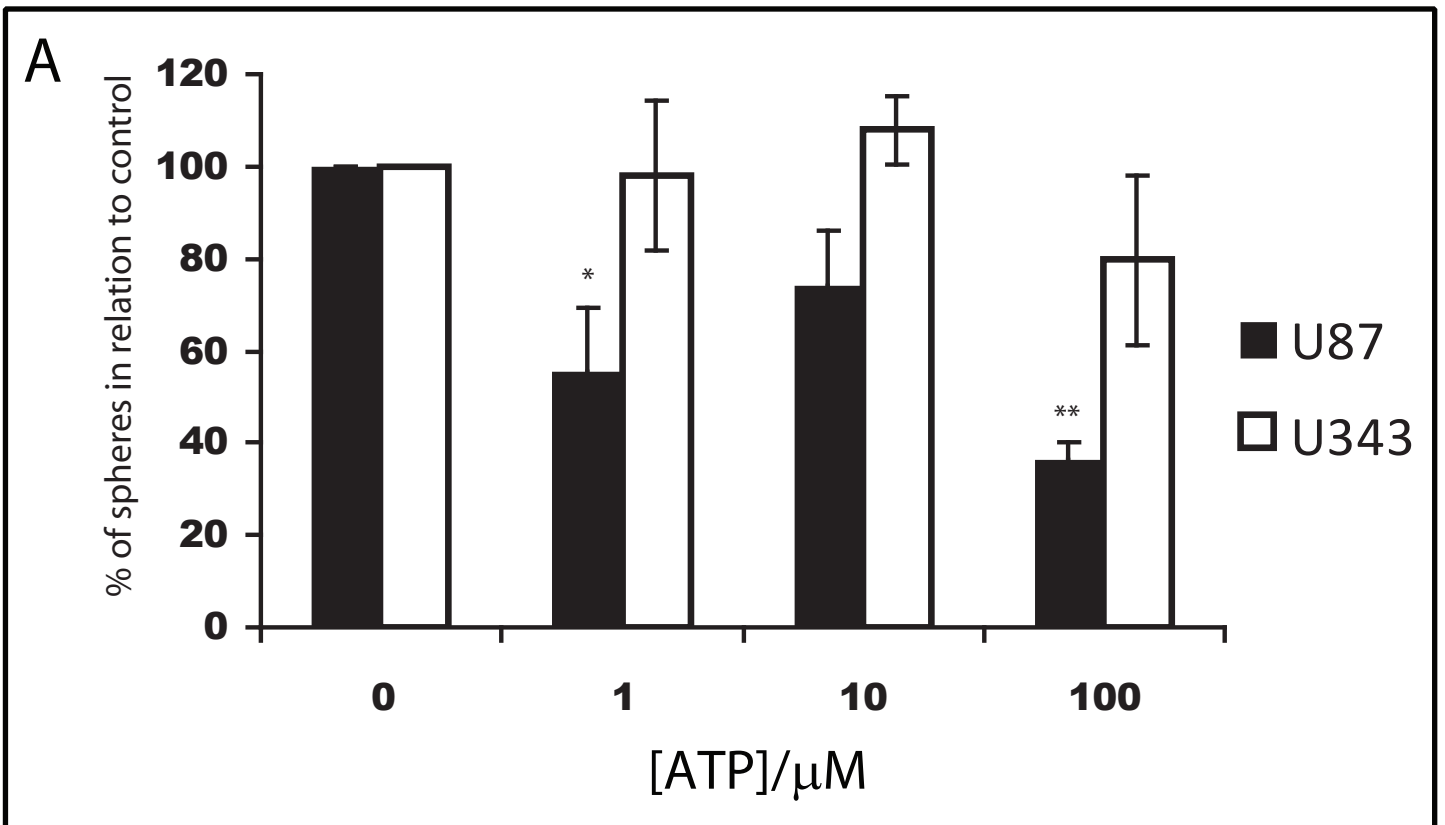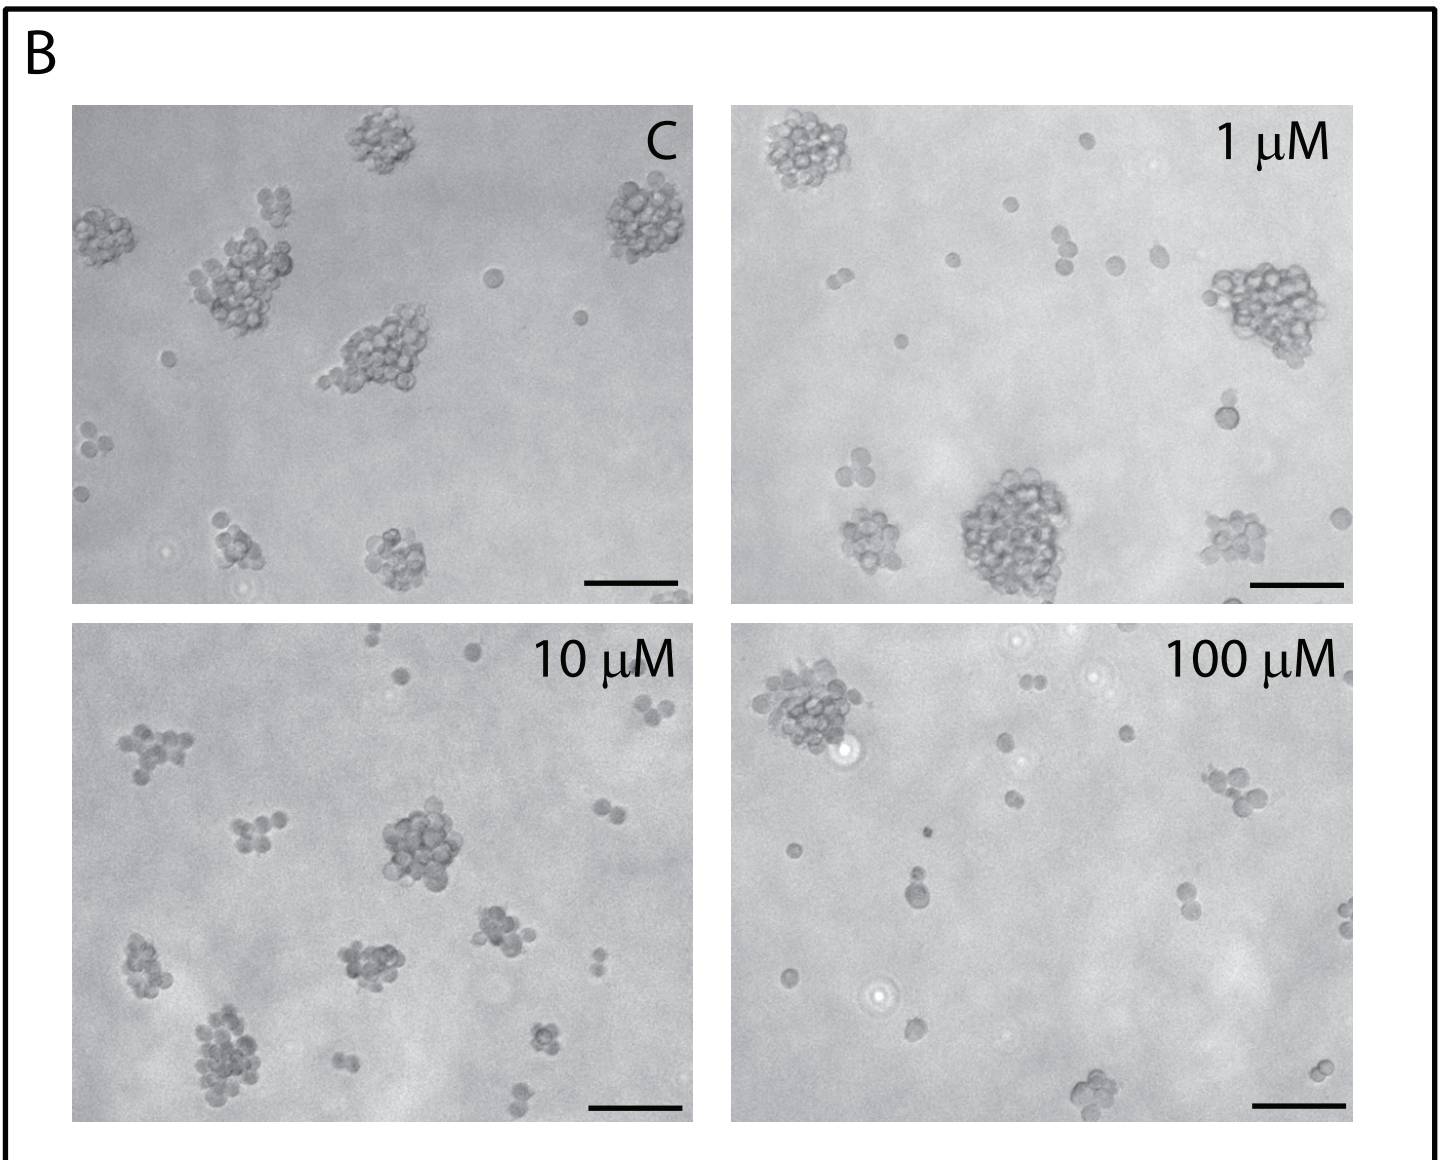

Supplement: 11302_2011_9252_MOESM2_ESM.pdf [file 11302_2011_9252_MOESM2_ESM.pdf]
